# Supplementary material for: FAPbBr3@GA2PbBr4 quantum dots: one step fabrication with improved stability for light-emitting applications
Source: Royal Society of Chemistry journal article supplement (doi:10.1039/d4qm00354c), 2024-01-01
Supplement: d4qm00354c1.pdf [file d4qm00354c1.pdf]

## Supporting Information

# Core-Shell $\text{FAPbBr}_3@G\text{A}_2\text{PbBr}_4$ Quantum Dots: One Step Fabrication and Potential Applications for Light-Emitting Diodes

*Jiaqi Liu,<sup>†</sup> Feng Zhang,<sup>\*,‡</sup> Cuihe Fan,<sup>†</sup> Zhengwei Cao,<sup>†</sup> Yuying Hao<sup>\*†</sup>*

<sup>†</sup> Key Laboratory of Advanced Transducers and Intelligent Control System (Ministry of Education), Taiyuan University of Technology, Taiyuan 030024, China.

<sup>‡</sup> Department of Physics and Optoelectronic Engineering, Beijing University of Technology, Beijing 100124, China

\* Email: [fengzhang@bjut.edu.cn](mailto:fengzhang@bjut.edu.cn); [haoyuying@tyut.edu.cn](mailto:haoyuying@tyut.edu.cn)

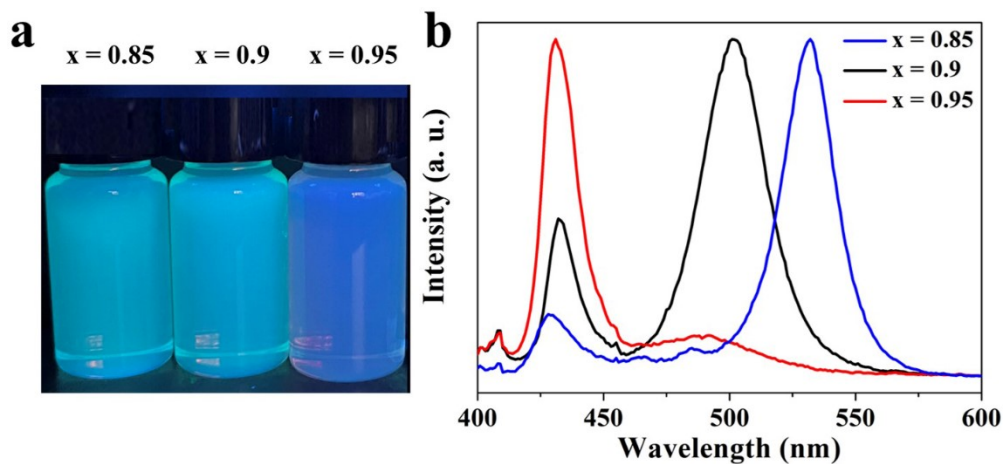

**Figure S1.** (a) Photographs of sample  $x = 0.85$ ,  $x = 0.9$ , and  $x = 0.95$  under UV radiation. (b) PL spectra of corresponding samples shown in **Figure S1a**.

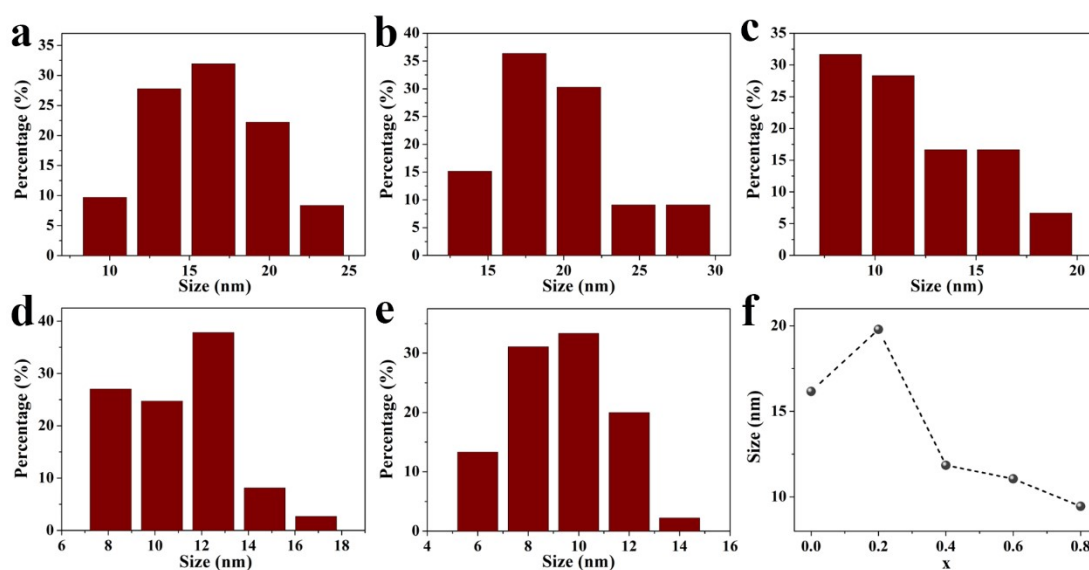

**Figure S2.** Analysis of size distribution for sample  $x = 0$  (a),  $x = 0.2$  (b),  $x = 0.4$  (c),  $x = 0.6$  (d) and  $x = 0.8$  (e). (f) The average size variation of as fabricated QDs with addition amount of GABr.

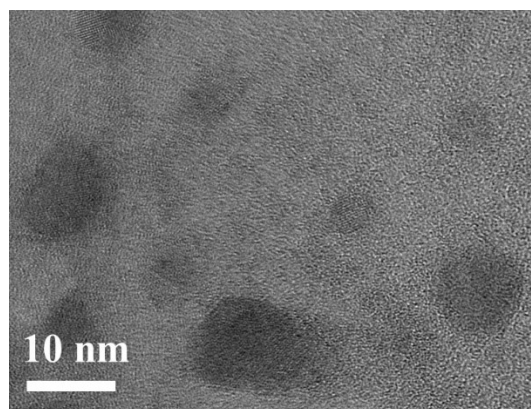

**Figure S3.** High resolution TEM image of sample  $x = 0.8$ .

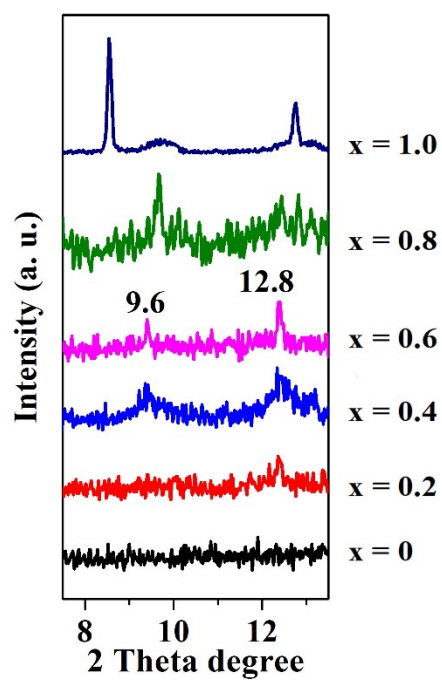

**Figure S4.** Enlarged XRD patterns (from  $7.5^\circ$  to  $13.5^\circ$ ) for  $x = 0$ ,  $x = 0.2$ ,  $x = 0.4$ ,  $x = 0.6$ ,  $x = 0.8$  and  $x = 1.0$ .

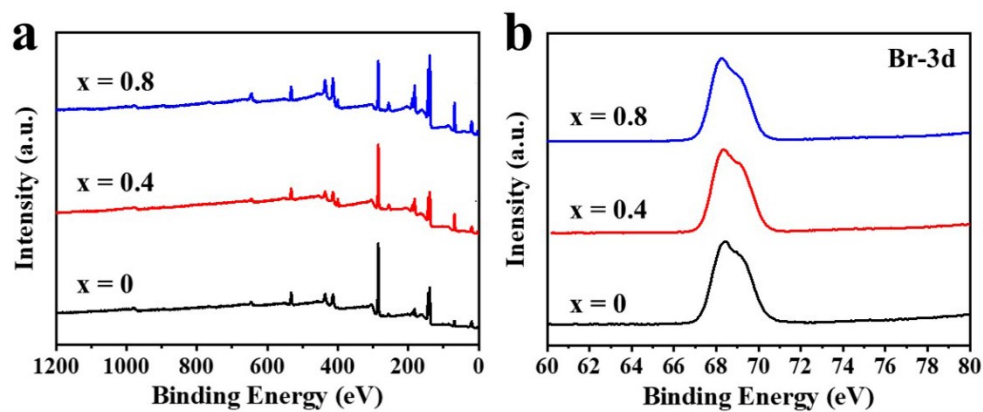

**Figure S5.** XPS results for sample  $x = 0$ ,  $x = 0.4$  and  $x = 0.8$ . (a) XPS full spectra. (b) XPS Br-3d spectra.

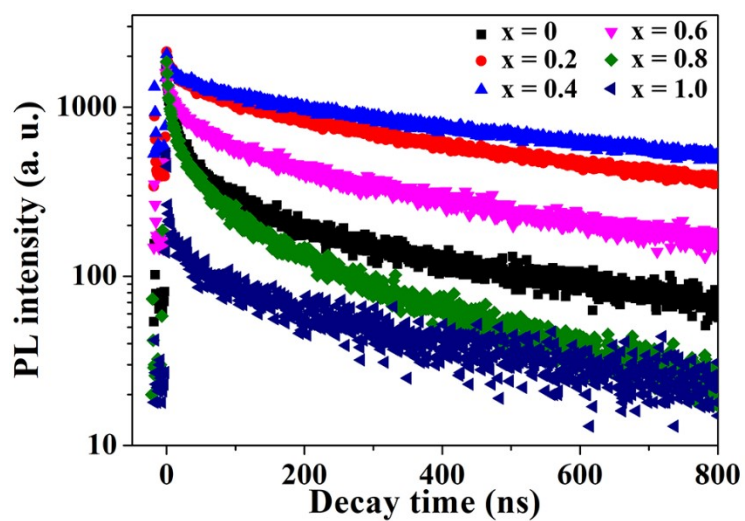

**Figure S6.** Time resolved PL spectra of QDs in solid state with  $x$  ranging from 0 to 1.

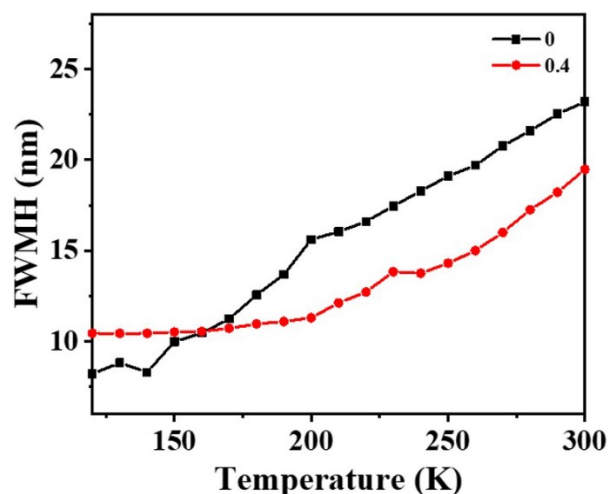

**Figure S7.** Plots of FWHM as a function of temperature for sample  $x = 0$  and  $x = 0.4$ .

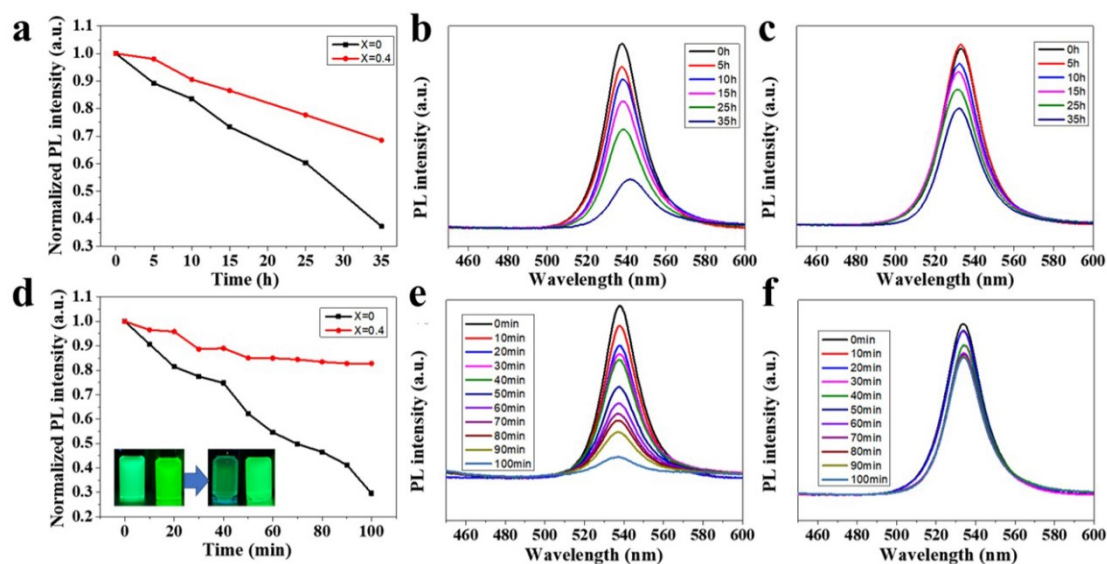

**Figure S8.** Photostability and moisture stability test for as fabricated FAPbBr<sub>3</sub> QDs and FAPbBr<sub>3</sub>/GA<sub>2</sub>PbBr<sub>4</sub> QDs. (a) PL intensity variation of FAPbBr<sub>3</sub> QDs and FAPbBr<sub>3</sub>/GA<sub>2</sub>PbBr<sub>4</sub> QDs under UV radiation (365 nm). (b, c) Corresponding PL spectra of FAPbBr<sub>3</sub> QDs and FAPbBr<sub>3</sub>/GA<sub>2</sub>PbBr<sub>4</sub> QDs under UV radiation, respectively. (d) PL intensity variation of FAPbBr<sub>3</sub> QDs and FAPbBr<sub>3</sub>/GA<sub>2</sub>PbBr<sub>4</sub> QDs after water exposure. (e, f) Corresponding PL spectra of FAPbBr<sub>3</sub> QDs and FAPbBr<sub>3</sub>/GA<sub>2</sub>PbBr<sub>4</sub> QDs after water exposure at different time periods.

**Table S1** Detailed addition amount of FABr, GABr, and PbBr<sub>2</sub> for sample x = 0, x = 0.2, x = 0.4, x = 0.6, x = 0.8 and x = 1.0.

| <b>Sample</b>  | <b>FABr</b>     | <b>GABr</b>     | <b>PbBr<sub>2</sub></b> |
|----------------|-----------------|-----------------|-------------------------|
| <b>x = 0</b>   | <b>0.0125 g</b> | <b>0 g</b>      | <b>0.0365 g</b>         |
| <b>x = 0.2</b> | <b>0.01 g</b>   | <b>0.0028 g</b> | <b>0.0365 g</b>         |
| <b>x = 0.4</b> | <b>0.0075 g</b> | <b>0.0056 g</b> | <b>0.0365 g</b>         |
| <b>x = 0.6</b> | <b>0.005 g</b>  | <b>0.0084 g</b> | <b>0.0365 g</b>         |
| <b>x = 0.8</b> | <b>0.0025 g</b> | <b>0.0112 g</b> | <b>0.0365 g</b>         |
| <b>x = 1.0</b> | <b>0 g</b>      | <b>0.0140 g</b> | <b>0.0365 g</b>         |

**Table S2.** Fitting results of average PL lifetime for sample x = 0, x = 0.2, x = 0.4, x = 0.6, x = 0.8 and x = 1.0.

| <b>Sample</b>  | <b>Average PL lifetime</b> |
|----------------|----------------------------|
| <b>x = 0</b>   | <b>29.92 ns</b>            |
| <b>x = 0.2</b> | <b>70.66 ns</b>            |
| <b>x = 0.4</b> | <b>170.38 ns</b>           |
| <b>x = 0.6</b> | <b>117.56 ns</b>           |
| <b>x = 0.8</b> | <b>40.25 ns</b>            |
| <b>x = 1.0</b> | <b>11.76 ns</b>            |
